# Supplementary material
Source: publisher site journal article supplement (https://www.dovepress.com/article/444061)

**A targeted multi-crystalline manganese oxide as tumor-selective nano-sized MRI contrast agent for early and accurate diagnosis of tumors**

Gongxin Yang1#, Jikai Xia2#, Xiaoqing Dai1#, Hongbo Zhao1, Weiqing Gao1, Weilong Ding1, Xiaofeng Tao1,*, Ling Zhu1,*

*1 Department of Radiology, Shanghai Ninth People’s Hospital, Shanghai Jiao Tong University, School of Medicine, Shanghai 200001, P.R. China*

*2 Department of Radiology, Yantai Affiliated Hospital of Binzhou Medical University, Yantai 264100, Shandong, China*

# These authors have contributed equally to this work.

*Correspondence: Xiaofeng Tao, Ling Zhu Department of Radiology, Shanghai Ninth People’s Hospital, Shanghai Jiao Tong University, School of Medicine, Shanghai 200001, P.R. China, E-mail: [cjr.taoxiaofeng@vip.163.com](mailto:cjr.taoxiaofeng@vip.163.com) and [zhuling011@126.com](mailto:zhuling011@126.com)

**
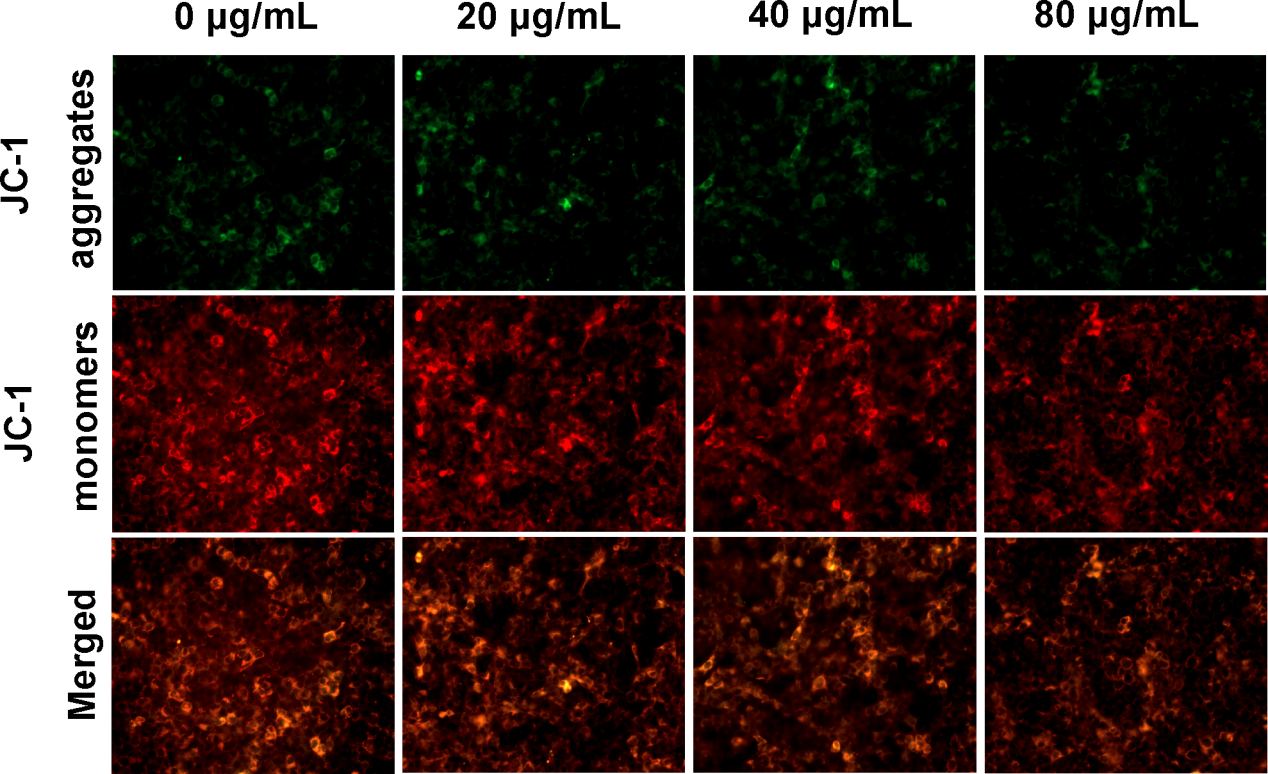
**

**Figure S1.** CLSM observation for mitochondrial membrane potential (MMP) change of PC-3 cells treated with different concentrations of iRGD-pMCMO.


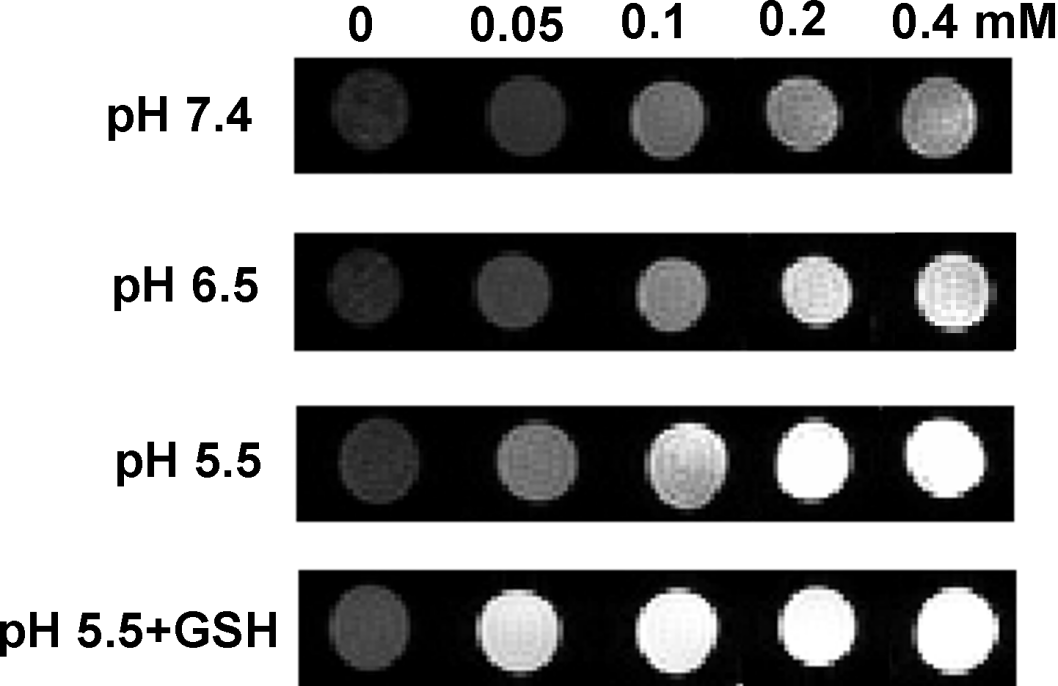

**Figure S2.** Brightness-darkness MRI images of iRGD-pMCMO at different pH conditions without and with GSH.

**Table S1.** The acute toxicity of iRGD-pMCMO at different injection dosages. (The SD rats included 5 male rats and 5 female rats.)


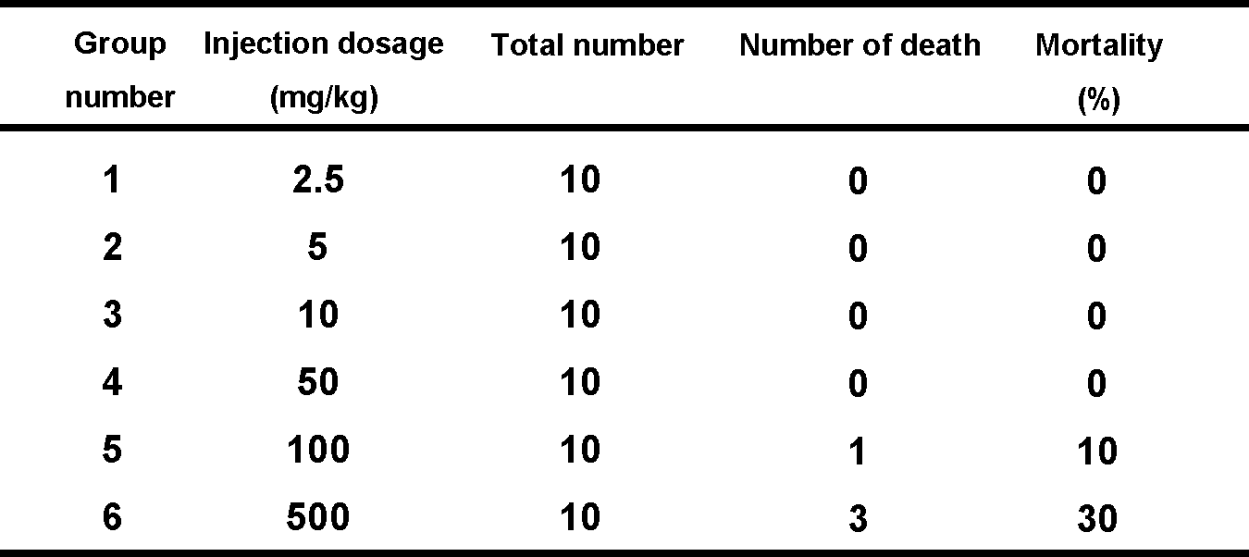

Supplement: Supplementary file 1 [file get_supplementary_file.php]
